# Supplementary material
Source: PubMed Central journal article supplement (PMC3662520)

SUPPLEMENTARY DATA

FIG. S1. Dynamics of observed plant phenology (means,  $n = 6$  replicates) for all the eight species in the control and warming plots from 2006 to 2009. For abbreviations see Table 1 in the text.

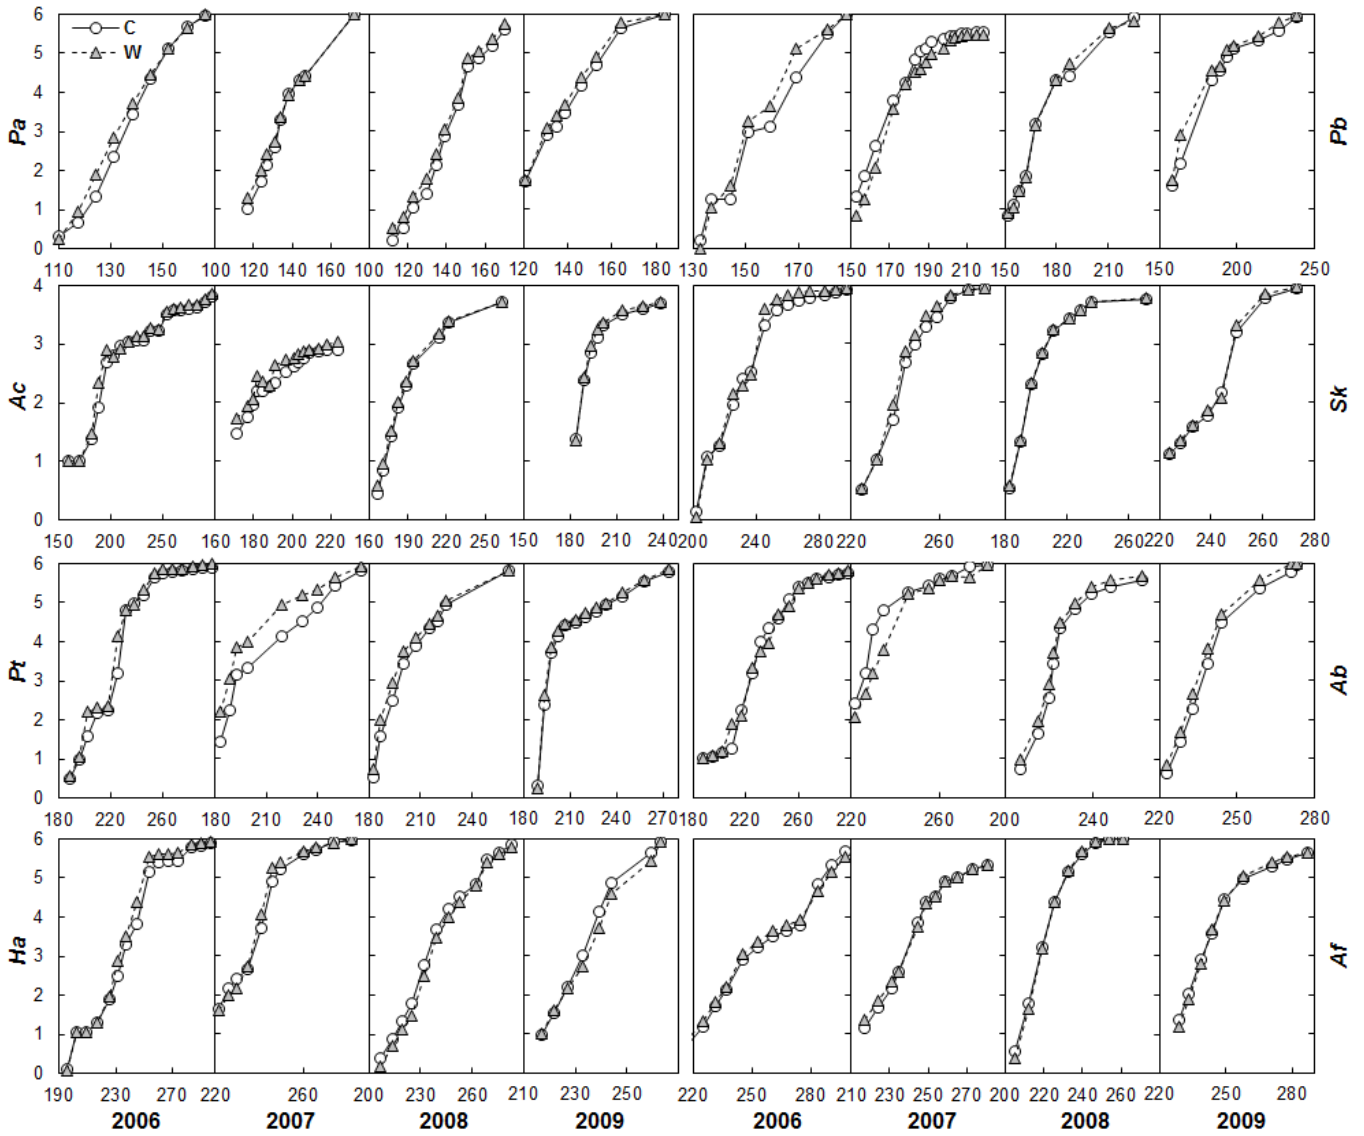

FIG. S2. Dynamics of observed plant phenology (means,  $n = 6$  replicates) for all the eight species in the N addition (N) and warming plus N addition (NW) plots from 2006 to 2009. For abbreviations see Table 1 in the text.

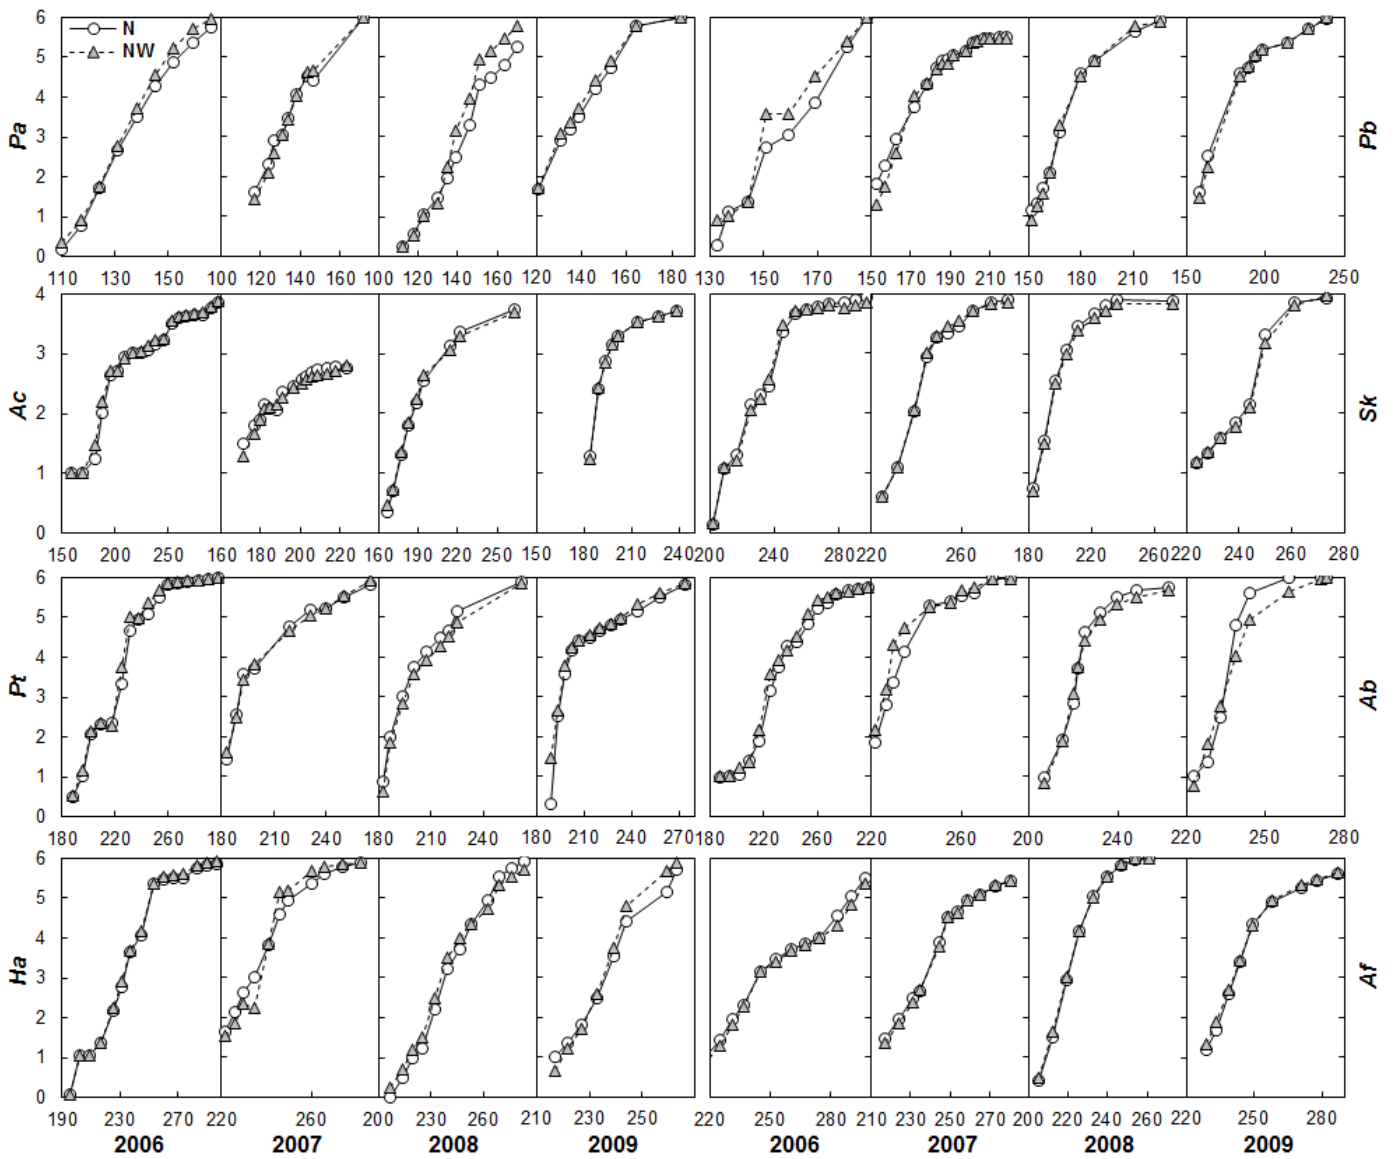

Supplement: supp_mct079_mct079supp.pdf [file supp_mct079_mct079supp.pdf]
